# Supplementary material for: GRcalculator: an online tool for calculating and mining dose–response data
Source: Springer Nature journal article supplement (doi:10.1186/s12885-017-3689-3), 2017-10-24
Supplement: MOESM1 [file 15159816]

HER2 amplified, HR+ for hormone receptor positive, NM for non-malignant, TNBC for Triple negative breast cancer, and Unknown for Unknown subtype) and transcriptional subtypes (Basal, Luminal, etc.) for each cell line. Taxol has been shown to be effective in

Fig 2: The GR Calculator application

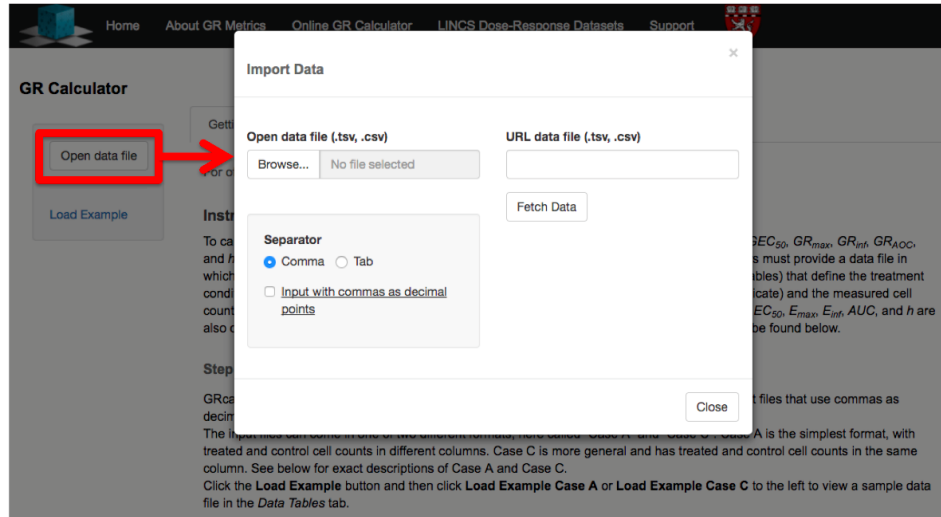

patients with either HER2 positive or TNBC cancers<sup>3,4,5</sup>, so we would expect it to have a stronger effect in the HER2 amplified and TNBC cell lines than in the ones of other subtypes. This difference should be reflected by lower values of the sensitivity metrics  $IC_{50}$  and  $GR_{50}$  for the HER2amp and TNBC cell lines. After analyzing the data, we will visualize these differences using the tools developed here.

Now, once the dataset is loaded (Fig. 3), remove “BioReplicate” from the “Select grouping variables” box by clicking on it and pressing the “delete” key. Removing

Fig 3: Response data for taxol loaded in the GR Calculator

| CellLine | ClinSubtype | TransSubtype | DrugName | concentration | cell_count | cell_count_ctrl | cell_count_time0 | BioReplicate |
|----------|-------------|--------------|----------|---------------|------------|-----------------|------------------|--------------|
| 184A1    | NM          | Basal        | Taxol    | 0.0000853     | 3853.6667  | 3893.3333       | 2707             | 9047.002     |
| 184A1    | NM          | Basal        | Taxol    | 0.0000853     | 4955.6667  | 4694            | 2429.5           | 10002.002    |
| 184A1    | NM          | Basal        | Taxol    | 0.0000853     | 3515.1667  | 3452.1667       | 1200             | 12684.002    |
| 184A1    | NM          | Basal        | Taxol    | 0.000427      | 3938.3333  | 3893.3333       | 2707             | 9047.002     |
| 184A1    | NM          | Basal        | Taxol    | 0.000427      | 4587.6667  | 4694            | 2429.5           | 10002.002    |
| 184A1    | NM          | Basal        | Taxol    | 0.000427      | 3253.8333  | 3452.1667       | 1200             | 12684.002    |
| 184A1    | NM          | Basal        | Taxol    | 0.00213       | 3870       | 3893.3333       | 2707             | 9047.002     |
| 184A1    | NM          | Basal        | Taxol    | 0.00213       | 4822.3333  | 4694            | 2429.5           | 10002.002    |
| 184A1    | NM          | Basal        | Taxol    | 0.00213       | 3461.5     | 3452.1667       | 1200             | 12684.002    |
| 184A1    | NM          | Basal        | Taxol    | 0.0107        | 3367.6667  | 3893.3333       | 2707             | 9047.002     |

grouping variables tells the calculator to average over those unselected variables; here we decided to average the biological replicates. Click the “Analyze” button to perform the curve fitting and calculate the GR and traditional metrics. This populates the “GR Values” and “Fitted Parameters” data tables and creates three new tabs: “Dose-Response by Condition”, “Dose-Response Grid”, and “GR Metric Comparison”.

The “Dose-Response by Condition” tab contains the fitted GR curves for each condition (Fig. 4). You may select any combination of values for each grouping variable to choose which curves you would like to see. The x-axis is the log (base 10) of concentration; the y-axis is either the GR value or relative cell count, depending on whether you select GR or IC as “curve type”. In the figure, we have selected “HER2amp” and “TNBC” clinical subtypes, “Basal A” transcriptional type, and of course “Taxol” as the drug. Leaving the “CellLine” box empty automatically selects all cell lines.

For datasets with many conditions, the “Dose-Response Grid” tab allows to quickly view many curves at once in a grid format (Fig. 5). You can choose between the GR and traditional (IC) curves. The first drop-down menu at the top, “Choose selector variable”, controls which values can be selected to highlight samples on the grid. The second selection box at the top, “Choose grid variables”, allows the user to choose which grouping variables define the grid. In the figure, we chose the combination of clinical and transcriptional subtypes to define the grid and we chose cell lines as the variable for highlighting samples; in the box on the left we picked a few specific cell lines.

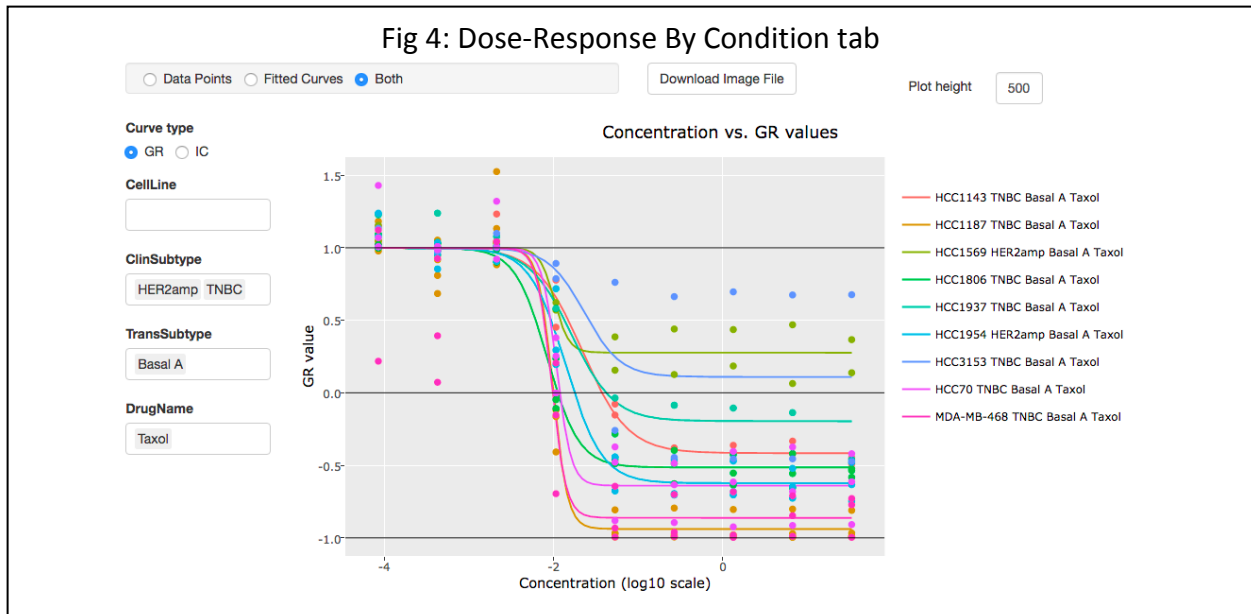

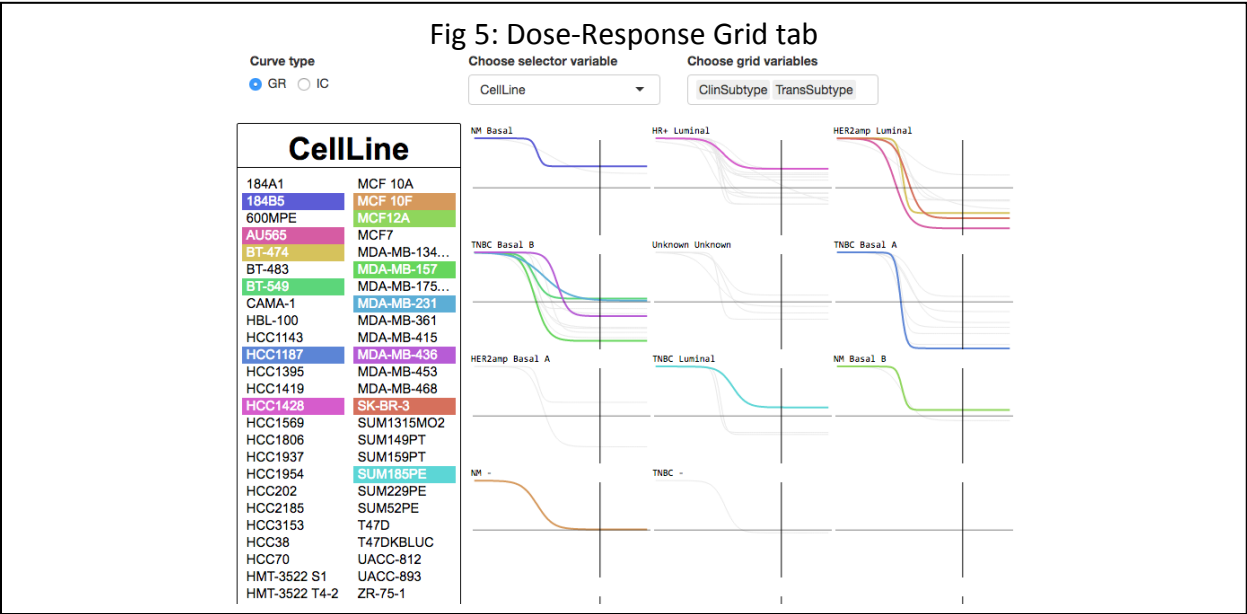

The tab “GR Metric Comparison” displays boxplots or scatter plots based on the GR or traditional metrics (Fig. 6). The boxplots can be particularly useful for comparing the potency or efficacy of a drug across many different conditions. The top selection box, “Select parameter”, allows you to choose the metric you would like to use (y-axis). The next selection box, “Select grouping variable”, allows you to specify the variable (e.g. clinical subtype) that will determine which values define the boxplots. By default up to ten boxplots are shown, but the user can select and de-select boxplots. Additionally, one may perform a Wilcoxon rank-sum test to assess if the values from one boxplot (or a set of boxplots) are significantly different from the ones from another boxplot or set of boxplots.

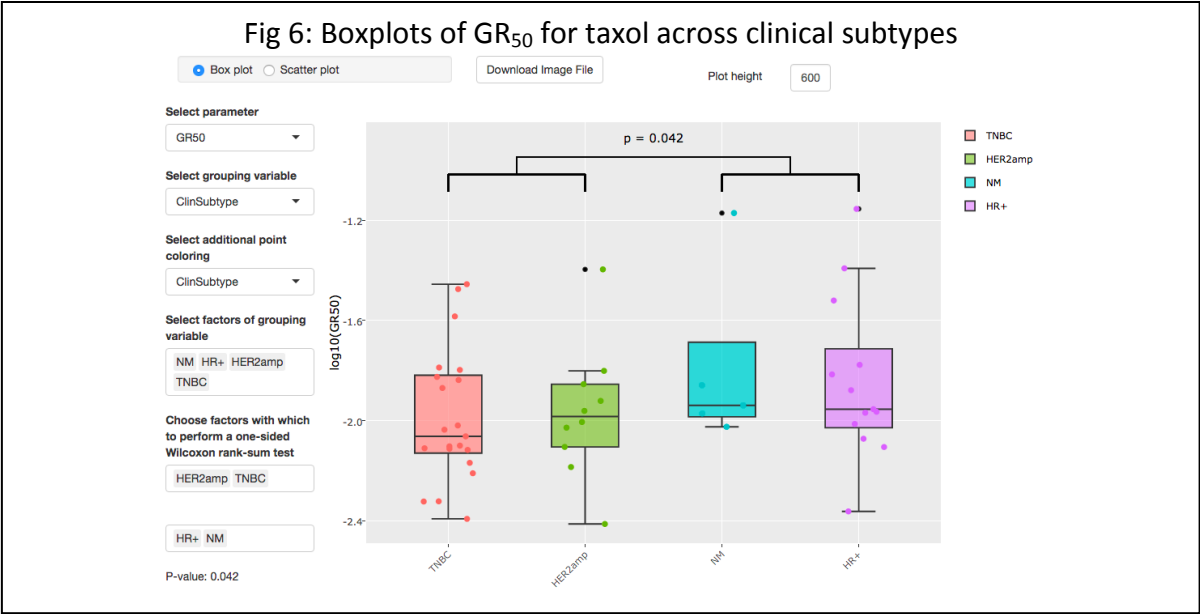

Figures 6 and 7 illustrate the  $GR_{50}$  and  $IC_{50}$  across the four clinical subtypes in the data (excluding “Unknown”). As stated before, we expect that values for the TNBC and HER2amp cell lines will be significantly less than those of the other clinical subtypes. After selecting “GR50” as our metric, we select “ClinSubtype” for the grouping variable and the point coloring, and we choose to compare “HER2amp” and “TNBC” cell lines against “HR+” and “NM” cell lines. By the p-value of 0.042, we can see that this group (“HER2amp” and “TNBC”) seems to have significantly lower  $GR_{50}$  values than the other clinical subtypes, as expected.

After verifying that taxol is most potent on HER2amp and TNBC cell lines as measured by  $GR_{50}$  values, we explore whether this result is the same using the traditional dose-response metric,  $IC_{50}$ . To do this, we simply change our parameter selection to “ $IC_{50}$ ”. As shown in Figure 7, the p-value is 0.42, indicating no significant difference in the toxicity of taxol between the two groups of clinical subtypes. From this example we see that the GR Calculator and the underlying GR value method is useful for detecting differences that can be hidden when using  $IC_{50}$  values, as traditional metrics are confounded by differences in division rates<sup>2</sup>.

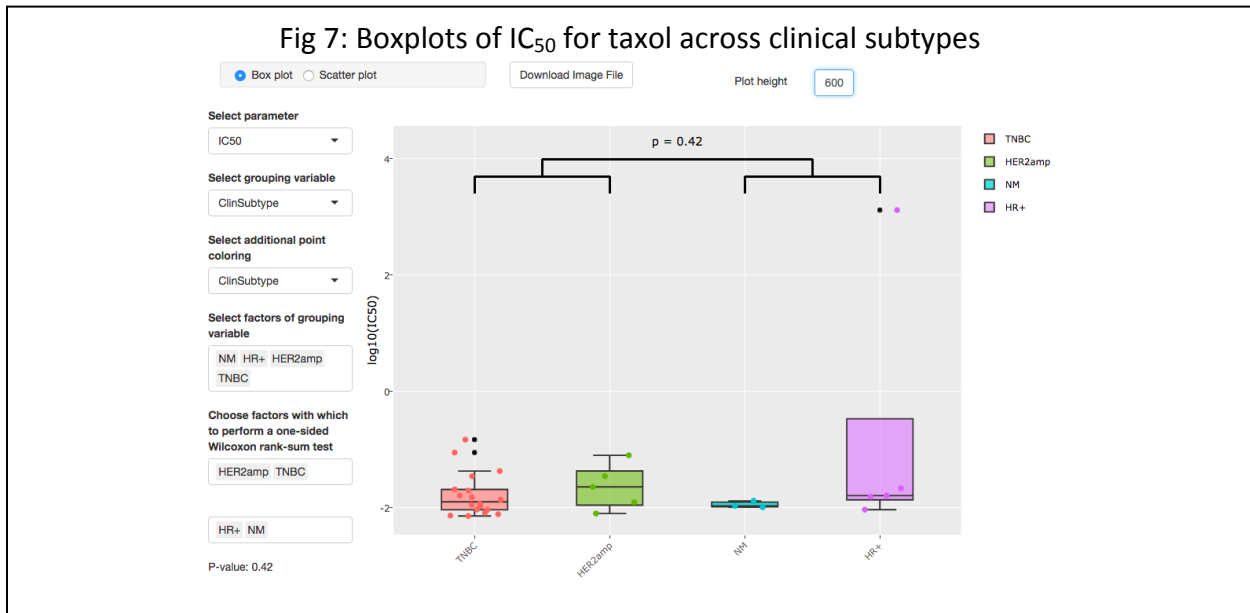

Most plots are interactive and will show extra information dynamically. For example, hovering over points and curves in the “Dose-Response by Condition” tab will display the GR value or relative cell count and corresponding concentration. In the “GR Metric Comparison” tab, hovering over a boxplot will display the maximum, minimum, and median values. The user can also hover over individual points in the boxplot and scatter plot visualizations to see detailed information. In addition, the user can adjust the plot height, zoom in, and download the figure in pdf or tiff format.

References:

1. Heiser LM, Sadanandam A, Kuo W-L, Benz SC, Goldstein TC, Ng S, Gibb WJ, Wang NJ, Ziyad S, Tong F et al: Subtype and pathway specific responses to anticancer compounds in breast cancer. *Proceedings of the National Academy of Sciences* 2012, 109(8):2724-2729.
2. Hafner M, Niepel M, Chung M, Sorger PK: Growth rate inhibition metrics correct for confounders in measuring sensitivity to cancer drugs. *Nat Meth* 2016, 13(6):521-527.
3. Blanchard Z, Paul BT, Craft B, ElShamy WM: BRCA1-IRIS inactivation overcomes paclitaxel resistance in triple negative breast cancers. *Breast Cancer Research* 2015, Jan 13;17:5
4. Mustacchi G, De Laurentiis M: The role of taxanes in triple-negative breast cancer: literature review. *Drug Design, Development and Therapy* 2015, Aug 5;9:4303-18
5. Hudis CA, Gianni L: Triple-negative breast cancer: an unmet medical need. *Oncologist*. 2011;16 Suppl 1:1-11
